# Supplementary material for: Inhibition of human-HPV hybrid ecDNA enhancers reduces oncogene expression and tumor growth in oropharyngeal cancer
Source: Springer Nature journal article supplement (doi:10.1038/s41467-025-57447-9), 2025-03-26
Supplement: MOESM1 [file 41467_2025_57447_MOESM1_ESM.pdf]

# **Inhibition of human-HPV hybrid ecDNA enhancers reduces oncogene expression and tumor growth in oropharyngeal cancer**

Takuya Nakagawa, Jens Luebeck, Kaiyuan Zhu, Joshua T. Lange, Roman Sasik, Chad Phillips, Sayed Sadat, Sara Javadzadeh, Qian Yang, Abdula Monther, Santiago Fassardi, Allen Wang, Kersi Pestonjamas, Brin Rosenthal, Kathleen M. Fisch, Paul Mischel, Vineet Bafna, & Joseph A. Califano

## **Supplementary Figures:**

Supplementary Fig. 1: **Hybrid ecDNA structure was validated by long DNA sequencing.**

Supplementary Fig. 2: **CRISPR interference targeting enhancers on hybrid ecDNA to SCC154 and NOKSI didn't block HPV oncogene expression.**

Supplementary Fig. 3: **JQ1 treatment on SCC154 did not significantly change E6/E7 expression.**

Supplementary Fig. 4: **Comparison of ChIP-seq, RNA-seq, and HiC-seq data between JQ1 treatment and DMSO in HMS001.**

Supplementary Fig. 5: **Short-time culture of PDX and multi-FISH between JQ1 treatment and DMSO in PDX\_A, and comparison of HiC-seq data between JQ1 treatment and DMSO in PDX\_A.**

**Supplementary Tables:**

Supplementary Table 1: **Copy number information of HPV in each sample.**

Supplementary Table 2: **gRNA information for CRISPRi.**

Supplementary Table 3: **Primer information for qPCR.**

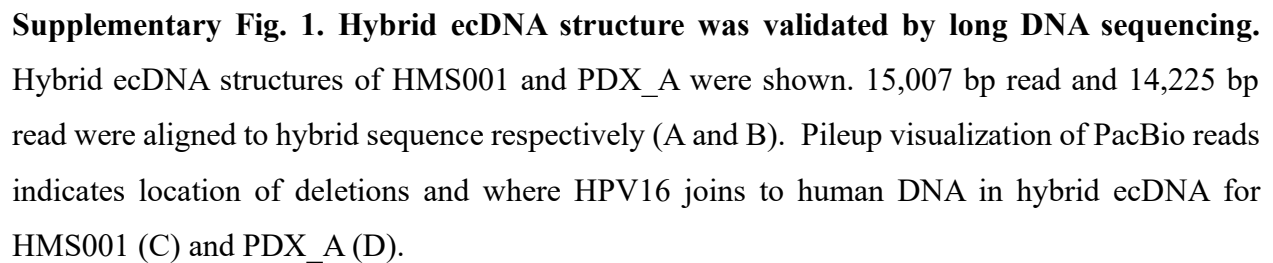

**S Fig. 2**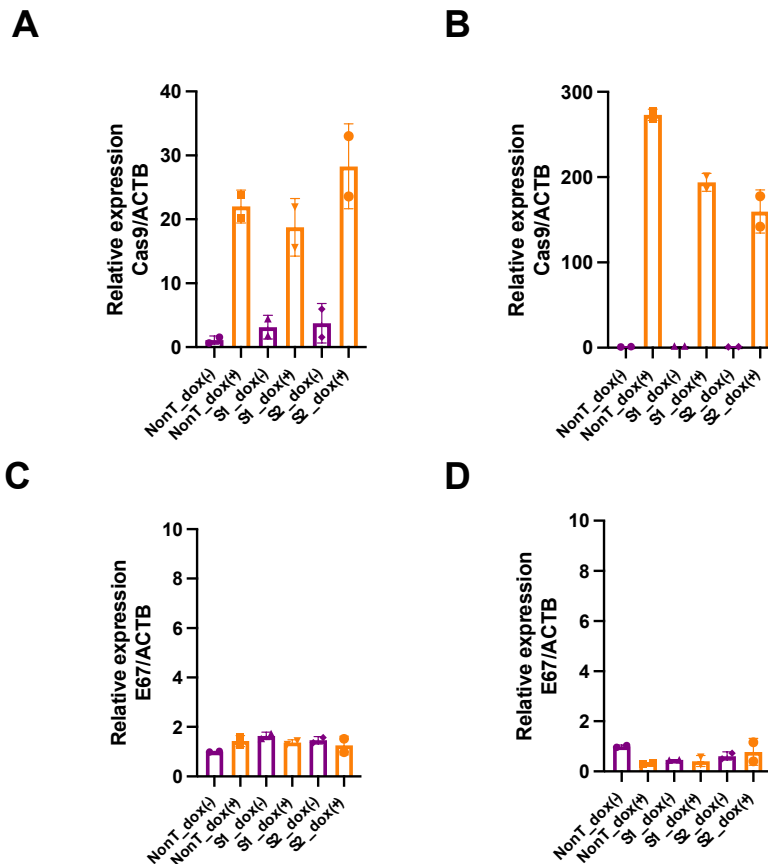

**Supplementary Fig. 2. CRISPR interference targeting enhancers on hybrid ecDNA to SCC154 and NOKSI didn't block HPV oncogene expression.** CRISPRi using dCas9-KRAB, targeting the enhancers (S1 and S2) on the hybrid ecDNA of HMS001 were performed for SCC154 and NOKSI. The expression of dCas9 in SCC154 and NOKSI after doxycycline induction was confirmed by qPCR (A and B). qPCR results of E6/E7 for SCC154 and NOKSI were shown. ACTB was used internal control. E6/E7 were not significantly changed in any CRISPRi condition (C and D, respectively). Two biological replicates were used and median with SD were shown. Source Data is available for panels A-D.

**S Fig. 3**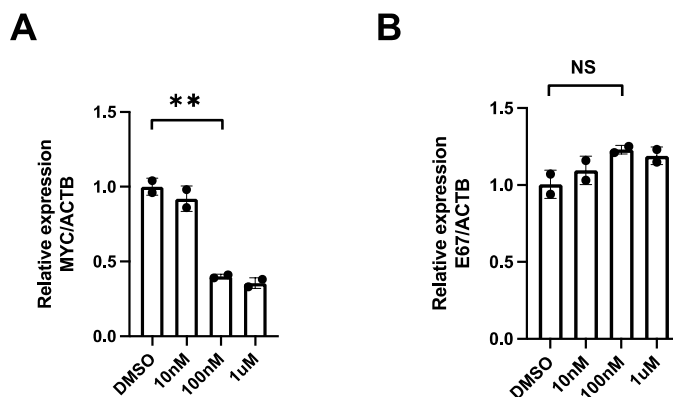

**Supplementary Fig. 3. JQ1 treatment on SCC154 did not significantly change E6/E7 expression.** qPCR results of MYC and E6/E7 were shown. ACTB was used internal control. MYC expressions were reduced after JQ1 treatment in a concentration-dependent manner, but E6/E7 were not changed after JQ1 treatment (A and B,  $**P = 0.005$  and  $P = 0.08$ , respectively, two-tailed student's *t*-test). Two biological replicates were used and median with SD were shown. Source Data is available for panels A and B.

## S Fig. 4

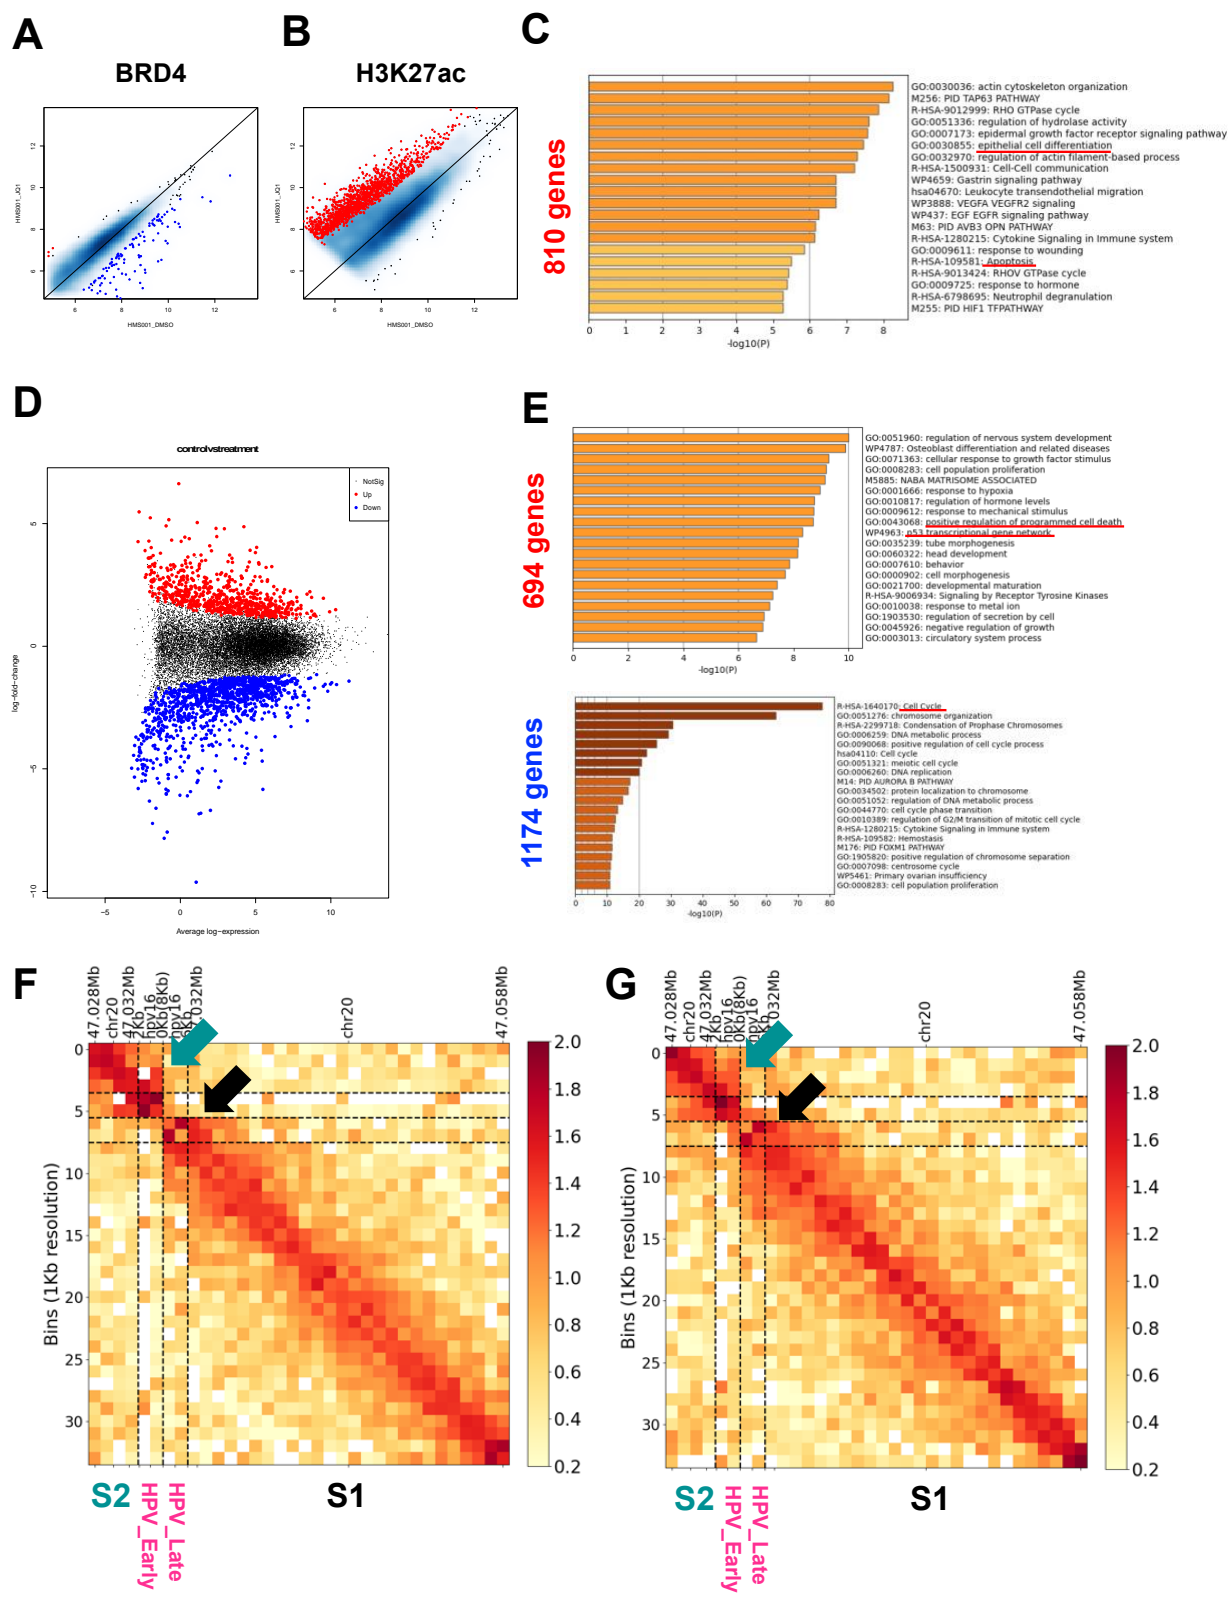

**Supplementary Fig. 4. Comparison of ChIP-seq, RNA-seq, and HiC-seq data between JQ1 treatment and DMSO in HMS001.** Differentially upregulated (red)/downregulated (blue) peaks of ChIP-seq for BRD4 or H3K27ac using HMS001 was shown (A and B, respectively). Gene Ontology analysis using 810 H3K27ac upregulated peaks with H3K4me1 peaks were shown (C). Differentially upregulated (red)/downregulated (blue) genes of RNA-seq using HMS001 with DMSO treatment or JQ1 treatment was shown (D). Gene Ontology analysis for differentially upregulated 694 genes and downregulated 1174 genes were shown (E). HiC-seq with DMSO treatment or JQ1 treatment was shown. HiC-seq showed no significant changes after JQ1 treatment in the interaction between S1 enhancer region and HPV late part (black allow) and between S2 and HPV early part (right green allow), suggesting that the structure of the hybrid ecDNA itself was not affected after JQ1 treatment (F and G)

## S Fig. 5

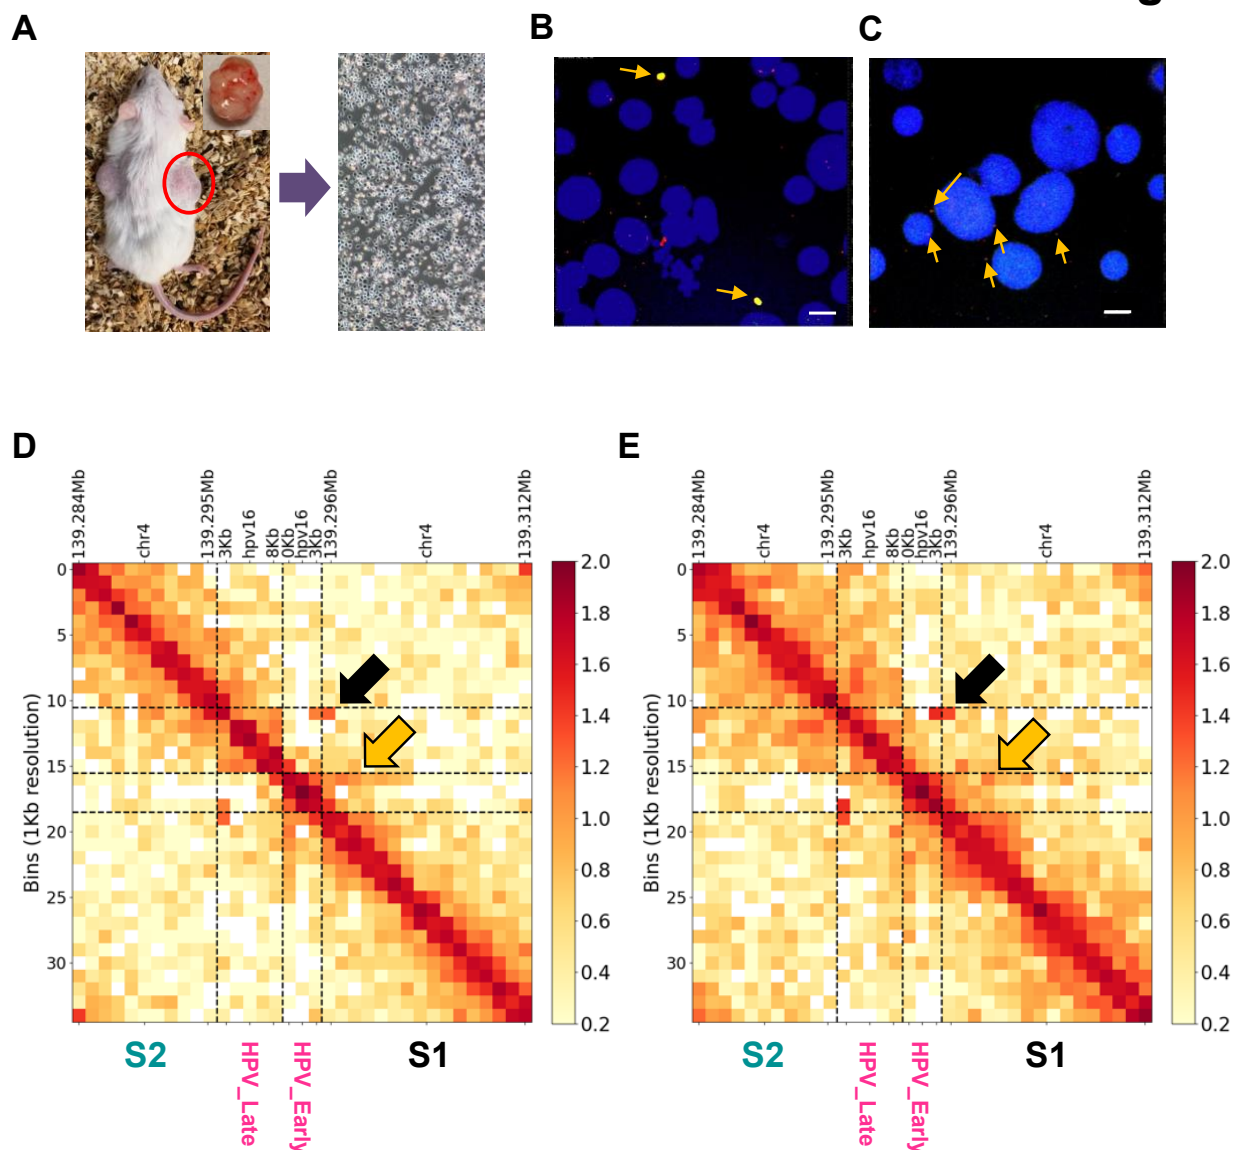

**Supplementary Fig. 5. Short-time culture of PDX and multi-FISH between JQ1 treatment and DMSO in PDX\_A, and comparison of HiC-seq data between JQ1 treatment and DMSO in PDX\_A.** Short-time culture of PDX\_A tumor was created (A). Multi-probe FISH using NDUFC2 probe and HPV probe on hybrid ecDNA for short-time culture of PDX\_A tumor is shown (B and C). Multi-FISH targeting hybrid ecDNA showed reduction of hybrid ecDNA FISH signals after JQ1 treatment. Each signal is green: NDUFC2, Red HPV, and blue: DAPI. Scale bar shows 10μm. HiC-seq with DMSO treatment or JQ1 treatment was shown. HiC-seq showed no significant changes after JQ1 treatment in the interaction between S1 enhancer region and HPV late part (black arrow) and between S1 and HPV early part (yellow arrow), suggesting that the structure of the hybrid ecDNA itself was not affected after JQ1 treatment (D and E).



S Table. 1

copynumber\_hpv\_samples\_strain\_cn

| sample           | HPV genome      | HPV max copy number |
|------------------|-----------------|---------------------|
| HMS001_hg38viral | HPV16           | 4.13783705889601    |
| Noksi            | NONE IDENTIFIED | NA                  |
| PDX_A_F3_DNA     | HPV16           | 4.10756382438681    |
| PDX_A_cell       | HPV16           | 4.688052399276280   |
| PDX_C_F3_DNA     | HPV16           | 41.3105258962521    |
| SCC154_combined  | HPV16           | 2.2921463017175100  |

Supplementary Table 1: Copy number information of HPV in each sample.

S Table. 2

|                                        |              |                      |
|----------------------------------------|--------------|----------------------|
| gRNA_list                              |              |                      |
| gRNA_hybrid_ecDNA_enhancer_short_rank4 |              | TAGTCAATACGACAACGAAT |
| gRNA_hybrid_ecDNA_enhancer_long_rank12 |              | GTCTAAGTCAATCCATCCCG |
| nontargeting_gRNA                      |              |                      |
| NonTargetingControlGuideForHuman_0001  | HGLibA_64384 | ACGGAGGCTAAGCGTCGCAA |

Supplementary Table 2: gRNA information for CRISPRi.

S Table. 3

|                    |                        |
|--------------------|------------------------|
| ACTB_F             | CACCATTGGCAATGAGCGGTTC |
| ACTB_R             | AGGTCTTTGCGGATGTCCACGT |
| E67 F              | CCGGTCGATGTATGTCTTGTT  |
| E67 R              | GAATGTCTACGTGTGTGCTTTG |
| dCas9_F            | GCGAGCTGCAGAAAGGTAAC   |
| dCas9_R            | GCGAGGATCACTCTTTTGGA   |
| cMYC Human qPCR F1 | CCTGGTGCTCCATGAGGAGAC  |
| cMYC Human qPCR R1 | CAGACTCTGACCTTTTGCCAGG |

Supplementary Table 3: Primer information for qPCR.
